# Supplementary material for: A critical evaluation of decadal solar cycle imprints in the MiKlip historical ensemble simulations
Source: Copernicus journal article supplement (doi:10.5194/wcd-2023-9), 2023-03-24
Supplement: Supplementary file 1 [file wcd-2023-9-supplement.pdf]

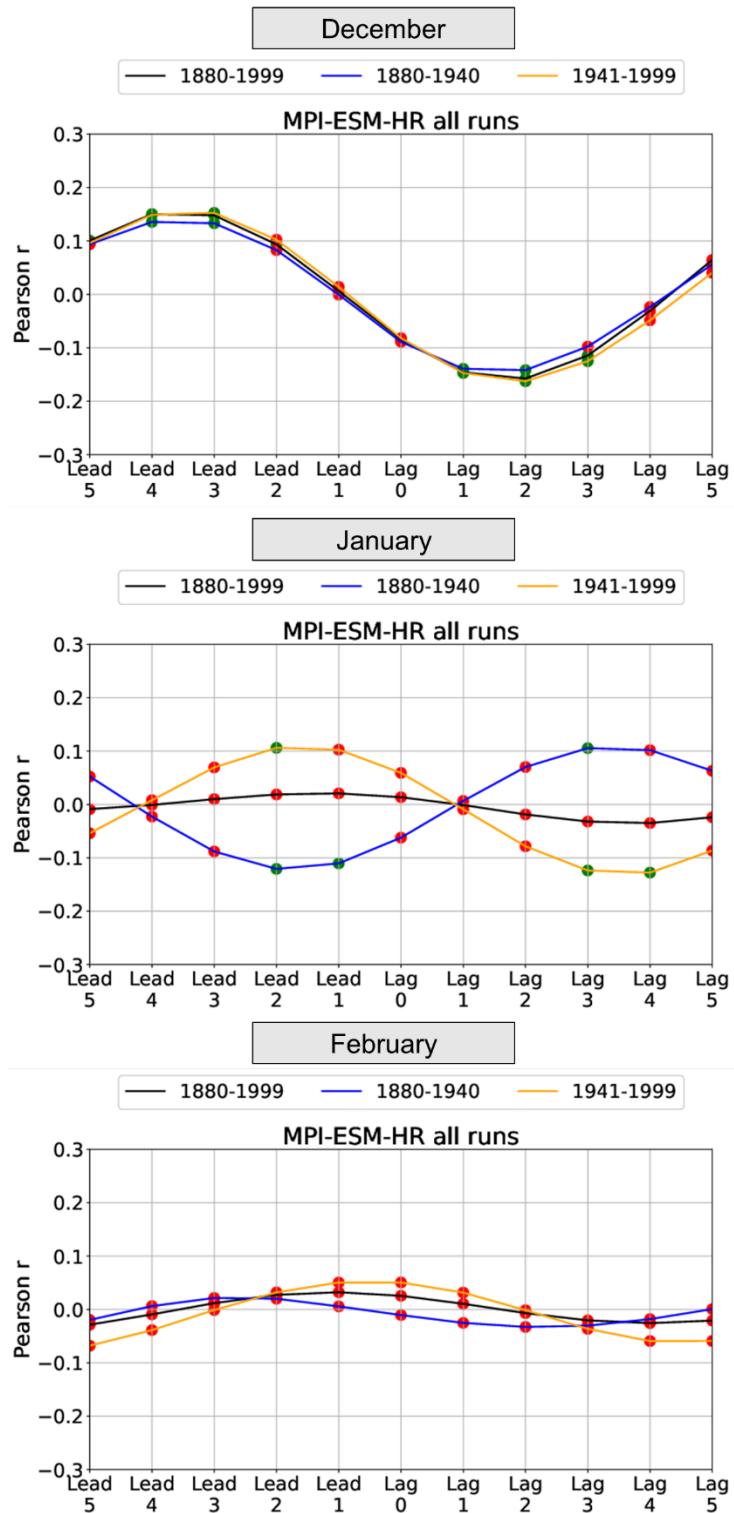

**Supplementary Figure 1:** Lead/lag-correlations between the bandpass filtered (December, January, February) NAO (PC1) and SSN time series. For the HadSLP2 dataset and the ensemble mean over the MPI-ESM-HR historical simulations (top row) and the individual MPI-ESM-HR historical runs (rows 2 to 6). Green dots mark statistically significant (95%) correlations.
